# Supplementary material
Source: Royal Society of Chemistry journal article supplement (doi:10.1039/d6ay00780e)
Supplement: d6ay00780e1.pdf [file d6ay00780e1.pdf]

## Supplementary Information

### Smartphone-Based Colorimetric Analysis of pH Strips Using Machine Learning

Ece Yıldız<sup>a</sup>, Mustafa Şen<sup>a</sup>, and Mehmet Akif Özdemir<sup>\*,a,b</sup>

<sup>a</sup>Department of Biomedical Engineering, Izmir Katip Celebi University, Izmir, Türkiye

<sup>b</sup>Biomedical Research in AI & Neuroscience Laboratory, Izmir Katip Celebi University,  
Izmir, Türkiye

E-mail: [makif.ozdemir@ikcu.edu.tr](mailto:makif.ozdemir@ikcu.edu.tr)

\*Corresponding Author.

**Table S1.** Computational performance comparison of the original 33-feature model and the SHAP-optimized 6-feature model deployed on the smartphone application.

| Model                | Features | TFLite Size | Memory Usage | Inference Time     | Performance ( $R^2$ ) |
|----------------------|----------|-------------|--------------|--------------------|-----------------------|
| 33-feature model     | 33       | 16 KB       | 0.18 MB      | $0.10 \pm 0.02$ ms | 0.988                 |
| SHAP-optimized model | 6        | 6 KB        | 0.18 MB      | $0.06 \pm 0.02$ ms | 0.969                 |

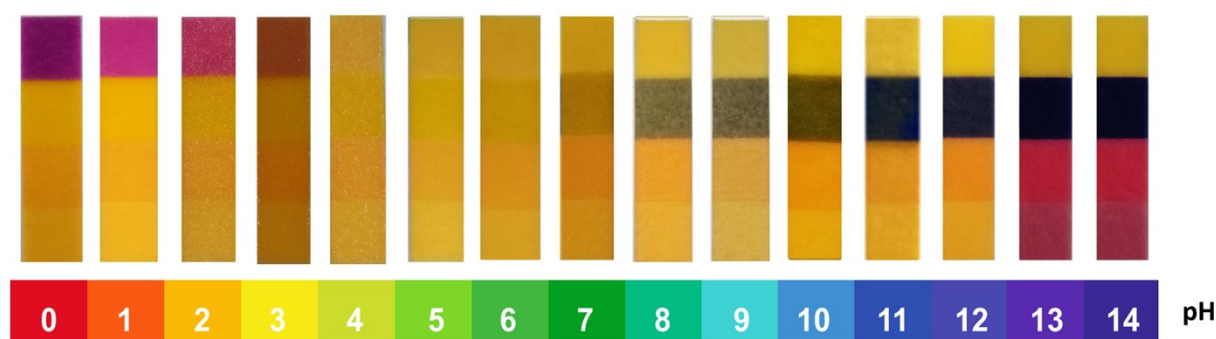

**Figure S1.** Representative regions of interest (ROIs) obtained from images captured using a different smartphone (Huawei Mate 10 Lite) for external validation.

## Predicted vs True pH

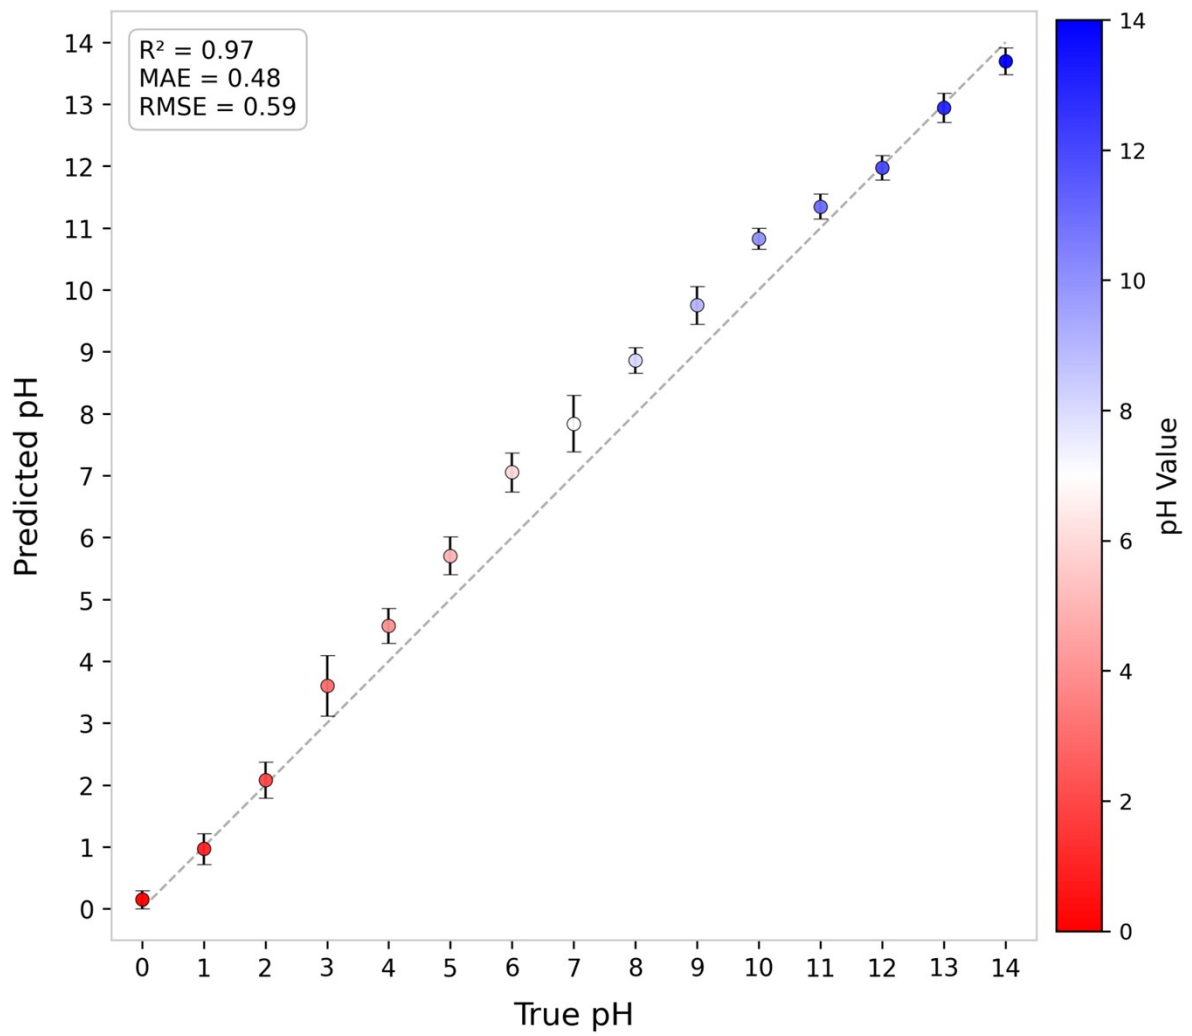

**Figure S2.** Predicted versus true pH regression plot for images acquired using a different smartphone (Huawei Mate 10 Lite) to evaluate cross-device model generalizability.
